# Supplementary material
Source: PubMed Central journal article supplement (PMC9287385)
Supplement: 41418_2022_1025_MOESM27_ESM.pdf [file 41418_2022_1025_MOESM27_ESM.pdf]

# DECLARATION OF CONTRIBUTIONS TO ARTICLE

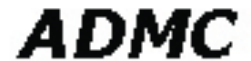

Manuscript Number:

CDD-21-2551RR

Journal Name:

Cell Death & Differentiation

(the 'Journal')

Proposed Title of the Contribution:

**Ca<sup>2+</sup>-mediated mitochondrial inner membrane permeabilization induces cell death independently of Bax and Bak**

(the 'Contribution')

Author(s):

Giovanni Quarato, Fabien Llambi, Cliff S. Guy, Jaeki Min, Marisa Actis, Sun Huan, Shilpa Narina, Shondra M. Pruettt-Miller, Junmin Peng, Zoran Rankovic and Douglas R. Green

(the 'Authors')

For all CDD articles, each person named as an author in the published version must be able to show he or she has contributed substantially to the article.

Authorship credit should be based on 1) substantial contributions to conception and design, acquisition of data, or analysis and interpretation of data; 2) drafting the article or revising it critically for important intellectual content; and 3) final approval of the version to be published. Authors should meet conditions 1, 2 and 3.

Any person who cannot be shown to have made a substantial contribution to the article cannot be listed as an author in the final version. The name of any person who is deemed to have made a minor contribution can, however, appear in the Acknowledgments section of the article.

Please complete the table below to indicate the contributions of all named authors to the manuscript.

| Author Full Name:         | Specification of Contribution to the Manuscript:                                                                               |
|---------------------------|--------------------------------------------------------------------------------------------------------------------------------|
| Giovanni Quarato          | Performed the experiments and analyzed the results; conceived and designed the work and wrote the manuscript.                  |
| Fabien Llambi             | Performed the experiments and analyzed the results; conceived and designed the work.                                           |
| Cliff S. Guy              | Performed the experiments and analyzed the results.                                                                            |
| Jaeki Min                 | Supervised the study and provided access to material and facilities.                                                           |
| Marisa Actis              | Performed the experiments and analyzed the results.                                                                            |
| Sun Huan                  | Performed the experiments and analyzed the results.                                                                            |
| Shilpa Narina             | Performed the experiments and analyzed the results.                                                                            |
| Shondra M. Pruettt-Miller | Supervised the study and provided access to material and facilities.                                                           |
| Junmin Peng               | Supervised the study and provided access to material and facilities.                                                           |
| Zoran Rankovic            | Supervised the study and provided access to material and facilities.                                                           |
| Douglas R. Green          | Supervised the study and provided access to material and facilities; conceived and designed the work and wrote the manuscript. |
|                           |                                                                                                                                |
|                           |                                                                                                                                |

Please complete the table below to indicate the contributions of all named authors to the figures.

Figure 1:

GQ and CSG generated the data in all the panels ;GQ analyzed the data and assembled the figure.

Figure 2:

GQ and CSG generated the figure in panels a; GQ generated the data in panel b, c, d and e. Electron microscopy Core Facility in St. Jude Children's Research Hospital acquired the images in panel c; GQ analyzed the data and assembled the figure.

Figure 3:

FL generated the data in panel a and b; GQ generated the data in panel c, d, e and f. GQ analyzed the data and assembled the figure.

Figure 4:

GQ generated, analyzed the data and assembled the figure.

Figure 5:

GQ generated, analyzed the data and assembled the figure. SN generate cell lines used in panel b, c, f and g.

Figure 6:

GQ generated the data in panel a, b, c, d, e, f, g, h, i and k. GQ and CSG generated the data in panels j. GQ analyzed the data and assembled the figure.

Signed for and on behalf of the Author(s):



Print Name:

Giovanni Quarato

Date:

2022-05-27
